# Supplementary material for: Effectiveness of the e-NurSus Children Intervention in the Training of Nursing Students
Source: Int J Environ Res Public Health. 2019 Nov 5;16(21):4288. doi: 10.3390/ijerph16214288 (PMC6862581; doi:10.3390/ijerph16214288)
Supplement: Supplementary file 1 [file ijerph-16-04288-s001.pdf]

**Table S1.** Means for attitudes and skills items and correct answers for knowledge items in the pre-test and post-test scales in Spain and United Kingdom

| Item             |                                                                                                                                                   | Spain <sup>1</sup>     |                         |            |                      | United Kingdom <sup>2</sup> |                         |            |                      |
|------------------|---------------------------------------------------------------------------------------------------------------------------------------------------|------------------------|-------------------------|------------|----------------------|-----------------------------|-------------------------|------------|----------------------|
|                  |                                                                                                                                                   | Pre-value <sup>3</sup> | Post-value <sup>3</sup> | % increase | p-value <sup>4</sup> | Pre-value <sup>3</sup>      | Post-value <sup>3</sup> | % increase | p-value <sup>4</sup> |
|                  |                                                                                                                                                   | M                      | M                       |            |                      | M                           | M                       |            |                      |
| <b>Attitudes</b> |                                                                                                                                                   |                        |                         |            |                      |                             |                         |            |                      |
| 1.               | Climate change is an important issue for nursing.                                                                                                 | 5.98 ± 1.27            | 6.80 ± 0.56             | 13.71%     | <0.001               | 5.29 ± 1.41                 | 6.22 ± 1.28             | 17.58%     | <0.001               |
| 2.               | Issues about climate change should be included in the nursing curriculum.                                                                         | 4.64 ± 1.62            | 6.31 ± 0.92             | 35.99%     | <0.001               | 4.74 ± 1.58                 | 5.88 ± 1.34             | 24.05%     | <0.001               |
| 3.               | Sustainability is an important issue for nursing.                                                                                                 | 5.49 ± 1.42            | 6.54 ± 0.81             | 19.13%     | <0.001               | 6.08 ± 1.20                 | 6.27 ± 1.18             | 3.03%      | 0.084                |
| 4.               | Sustainability should be included in the nursing curriculum.                                                                                      | 4.69 ± 1.64            | 6.26 ± 0.98             | 33.48%     | <0.001               | 5.68 ± 1.35                 | 6.11 ± 1.67             | 7.57%      | <0.001               |
| 5.               | I apply sustainability principles at home.                                                                                                        | 4.90 ± 1.46            | 5.69 ± 1.21             | 16.12%     | <0.001               | 5.27 ± 1.39                 | 5.57 ± 1.26             | 5.69%      | 0.011                |
| <b>Knowledge</b> |                                                                                                                                                   |                        |                         |            |                      |                             |                         |            |                      |
|                  |                                                                                                                                                   | Correct Answers        | Correct Answers         |            |                      | Correct Answers             | Correct Answers         |            |                      |
| 1.               | The pediatric population is more susceptible to environmental threats due to their biological immaturity.                                         | 103                    | 110                     | 6.80%      | 1.000                | 112                         | 152                     | 35.71%     | <0.001               |
| 2.               | The increased energy and metabolic consumption of the pediatric population protects children from environmental hazards.                          | 70                     | 94                      | 34.29%     | 0.001                | 66                          | 84                      | 27.27%     | 0.027                |
| 3.               | The higher rate of cell growth during the pediatric age increases the risk of health effects caused by environmental factors.                     | 71                     | 102                     | 43.66%     | <0.001               | 83                          | 132                     | 59.04%     | <0.001               |
| 4.               | Environmental factors do not influence hormonal secretion during puberty.                                                                         | 95                     | 106                     | 11.58%     | 0.013                | 101                         | 123                     | 21.78%     | 0.002                |
| 5.               | Nitrogen oxide from fossil fuels in the home and tobacco smoke causes redness and burns on the skin.                                              | 14                     | 8                       | -42.86%    | 0.238                | 27                          | 20                      | -25.93%    | 0.311                |
| 6.               | Particles from animals exacerbate asthma crisis.                                                                                                  | 68                     | 108                     | 58.82%     | <0.001               | 108                         | 145                     | 34.26%     | <0.001               |
| 7.               | Increased humidity at home improves respiratory diseases in children.                                                                             | 59                     | 95                      | 61.02%     | <0.001               | 69                          | 74                      | 7.25%      | 0.590                |
| 8.               | Passive smoking is associated with the development of acute leukemia in children.                                                                 | 51                     | 98                      | 92.16%     | <0.001               | 67                          | 120                     | 79.10%     | <0.001               |
| 9.               | Childhood leukemia incidence rates are higher in the areas most exposed to radon.                                                                 | 45                     | 93                      | 106.67%    | <0.001               | 86                          | 132                     | 53.49%     | <0.001               |
| 10.              | Overexposure to solar ultraviolet radiations can damage the skin of adults more severely than that of children.                                   | 83                     | 88                      | 6.02%      | 0.442                | 105                         | 102                     | -2.86%     | 0.780                |
| 11.              | During childhood more than half of the expected lifetime solar ultraviolet radiation is absorbed.                                                 | 51                     | 95                      | 86.27%     | <0.001               | 50                          | 98                      | 96.00%     | <0.001               |
| 12.              | Lead accumulates in the body affecting the nervous system.                                                                                        | 77                     | 100                     | 29.87%     | <0.001               | 81                          | 127                     | 56.79%     | <0.001               |
| 13.              | Chronic dietary exposure to mercury (fish and shellfish) is less toxic to children's central nervous system than to adults.                       | 66                     | 94                      | 42.42%     | <0.001               | 90                          | 119                     | 32.22%     | <0.001               |
| 14.              | Exposure to pesticides increases the risk of developing attention deficit problems in school-aged children.                                       | 53                     | 94                      | 77.36%     | <0.001               | 54                          | 111                     | 105.56%    | <0.001               |
| 15.              | Children born to smoking mothers during pregnancy are at risk of lower intellectual capacity.                                                     | 63                     | 95                      | 50.79%     | <0.001               | 96                          | 133                     | 38.54%     | <0.001               |
| 16.              | Exposure to organic solvents during fetal development can cause learning disabilities in children.                                                | 63                     | 96                      | 52.38%     | <0.001               | 66                          | 111                     | 68.18%     | <0.001               |
| 17.              | Water containing nitrates can only cause intoxication during childhood.                                                                           | 73                     | 72                      | -1.37%     | 1.000                | 64                          | 94                      | 46.88%     | 0.001                |
| 18.              | Chlorination of water forms sub-products from the disinfection process that have been classified as carcinogenic.                                 | 39                     | 90                      | 130.77%    | <0.001               | 34                          | 97                      | 135.29%    | <0.001               |
| 19.              | The major source of childhood exposure to pesticides is through ambient air.                                                                      | 19                     | 11                      | -42.11%    | 0.115                | 26                          | 20                      | -23.08%    | 0.362                |
| 20.              | The main route of exposure to mercury is through cereal intake.                                                                                   | 45                     | 42                      | -6.67%     | 0.766                | 74                          | 63                      | -14.86%    | 0.185                |
| 21.              | Exposure to lead through diet occurs mainly through fish intake.                                                                                  | 22                     | 23                      | 4.55%      | 1.000                | 27                          | 42                      | 55.56%     | 0.036                |
| 22.              | Food colourings and preservatives are associated with central nervous system problems.                                                            | 37                     | 89                      | 140.54%    | <0.001               | 40                          | 85                      | 112.50%    | <0.001               |
| 23.              | Genetically modified foods cause fewer allergic reactions in children.                                                                            | 67                     | 87                      | 29.85%     | 0.002                | 73                          | 86                      | 17.81%     | 0.136                |
| 24.              | Schools and nurseries are environmentally safe places.                                                                                            | 97                     | 105                     | 8.24%      | 0.057                | 75                          | 122                     | 62.67%     | <0.001               |
| 25.              | Children are exposed to higher concentrations of air pollutants at home than outdoors.                                                            | 61                     | 65                      | 6.56%      | 0.678                | 78                          | 76                      | -2.56%     | 0.905                |
| 26.              | Parks and gardens are the areas with the least environmental pollutants where children can play.                                                  | 67                     | 85                      | 26.87%     | 0.015                | 68                          | 86                      | 26.47%     | 0.036                |
| <b>Skills</b>    |                                                                                                                                                   |                        |                         |            |                      |                             |                         |            |                      |
|                  |                                                                                                                                                   | M                      | M                       |            |                      | M                           | M                       |            |                      |
| 1.               | I am able to assess the main environmental risks to which a child is exposed.                                                                     | 3.10 ± 0.93            | 4.27 ± 0.60             | 37.74%     | <0.001               | 3.36 ± 0.90                 | 4.01 ± 0.83             | 19.35%     | <0.001               |
| 2.               | I am NOT able to identify the environmental risks that can cause respiratory diseases in a child.                                                 | 3.18 ± 1.01            | 4.26 ± 0.82             | 33.96%     | <0.001               | 3.66 ± 0.90                 | 4.04 ± 0.88             | 10.38%     | <0.001               |
| 3.               | I am able to identify the environmental risks that can cause neoplastic diseases in a child.                                                      | 2.72 ± 0.90            | 4.20 ± 0.83             | 54.41%     | <0.001               | 2.02 ± 0.94                 | 3.24 ± 1.10             | 60.40%     | <0.001               |
| 4.               | I am NOT able to identify the environmental risks that can cause neurological disorders in a child.                                               | 2.92 ± 1.12            | 4.20 ± 0.75             | 43.84%     | <0.001               | 2.75 ± 1.07                 | 3.55 ± 0.98             | 29.09%     | <0.001               |
| 5.               | I am able to provide health education to parents about the main contaminants in their child's food.                                               | 2.76 ± 1.19            | 4.33 ± 0.90             | 56.88%     | <0.001               | 2.61 ± 1.09                 | 3.64 ± 0.96             | 39.46%     | <0.001               |
| 6.               | I am NOT able to identify the environmental risks in playgrounds.                                                                                 | 3.08 ± 1.06            | 4.17 ± 0.72             | 35.39%     | <0.001               | 3.40 ± 1.01                 | 3.93 ± 0.89             | 15.59%     | <0.001               |
| 7.               | I am able to provide health education to parents about actions to minimize environmental risks to which a child is exposed when playing outdoors. | 2.80 ± 1.06            | 4.39 ± 0.93             | 56.79%     | <0.001               | 3.11 ± 0.98                 | 3.81 ± 0.86             | 22.51%     | <0.001               |
| 8.               | I am NOT able to identify the environmental risks in a child's home.                                                                              | 3.06 ± 0.94            | 4.31 ± 0.66             | 40.85%     | <0.001               | 3.67 ± 0.90                 | 4.07 ± 0.88             | 10.90%     | <0.001               |
| 9.               | I am able to provide health promotion to parents about environmental risks at home.                                                               | 2.92 ± 1.02            | 4.25 ± 0.79             | 45.56%     | <0.001               | 3.45 ± 0.96                 | 4.04 ± 0.78             | 17.10%     | <0.001               |
| 10.              | I am able to identify the environmental risks in a child's school.                                                                                | 3.01 ± 0.89            | 4.27 ± 0.91             | 41.86%     | <0.001               | 3.34 ± 1.02                 | 3.93 ± 0.79             | 17.66%     | <0.001               |
| 11.              | I am NOT able to identify the actions needed to combat environmental risks in a child's school.                                                   | 3.09 ± 1.02            | 4.23 ± 1.00             | 36.89%     | <0.001               | 3.20 ± 0.96                 | 3.83 ± 0.89             | 19.69%     | <0.001               |
| 12.              | I do NOT feel able to do my job as a nurse in a Pediatric Environmental Health Specialty Unit.                                                    | 2.83 ± 1.22            | 4.27 ± 0.60             | 50.88%     | <0.001               | 3.01 ± 1.02                 | 3.68 ± 0.97             | 22.26%     | <0.001               |

<sup>1</sup>*n* = 110 for attitudes, *n* = 110 for knowledge and *n* = 109 for skills. <sup>2</sup>*n* = 157 for attitudes, *n* = 157 for knowledge and *n* = 154 for skills. <sup>3</sup>Means for attitudes and skills items and correct answers for knowledge items. <sup>4</sup>*p*-value in the Wilcoxon test for ordinal variables (attitudes and skills items) and McNemar test for nominal variables (knowledge items) comparing pre-test with post-test results.
